# Supplementary material for: BioSeqZip: a collapser of NGS redundant reads for the optimization of sequence analysis
Source: PubMed Central journal article supplement (PMC7203750; doi:10.1093/bioinformatics/btaa051), 2020-01-30
Supplement: btaa051_supplementary_data.pdf [file btaa051_supplementary_data.pdf]

---

# SUPPLEMENTARY MATERIAL OF **BIOSEQZIP: A COLLAPSER OF NGS REDUNDANT READS FOR THE OPTIMISATION OF SEQUENCE ANALYSIS**

---

A PREPRINT

**Gianvito Urgese**

Interuniversity Department of Regional and Urban Studies and Planning  
Politecnico di Torino  
Torino, Italy 10129  
gianvito.urgese@polito.it

**Emanuele Parisi**

Department of Control and Computer Engineering  
Politecnico di Torino  
Torino, Italy 10129  
emanuele.parisi@polito.it

**Orazio Scicolone**

Department of Control and Computer Engineering  
Politecnico di Torino  
Torino, Italy 10129  
orazio.scicolone@polito.it

**Santa Di Cataldo**

Department of Control and Computer Engineering  
Politecnico di Torino  
Torino, Italy 10129  
santa.dicataldo@polito.it

**Elisa Ficarra**

Department of Control and Computer Engineering  
Politecnico di Torino  
Torino, Italy 10129  
elisa.ficarra@polito.it

December 2, 2019

## ABSTRACT

In this document the supplementary material of the paper *BioSeqZip: a collapse of NGS redundant reads for the optimisation of sequence analysis*

**Keywords** Read collapse · NGS · RNA-Seq · Sequence aligner · Mapper · DNA-Seq · External sort

## 1 Supplementary Text

### 1.1 In/Out File Formats of *BioSeqZip\_Collapse*

*BioSeqZip\_Collapse* accepts as input Fasta, Fastq, Sam, and Bam file formats and generates compact output with four different file formats: Fasta, Fastq, Tag, and Tagq, respectively. All the input/output file formats can be optionally provided in compressed form (gzip). In the following we provide a brief summary of the key features of these formats.

- *FASTA* is a text-based file format used to represent either nucleotide or amino acids sequences. A sequence begins with a single-line description, followed by lines containing the sequence data. The description line begins with the sequence ID and is characterised by a '>' (greater than) symbol as the first character of the string. Following lines contain strings of characters representing the bio-molecule, using an appropriate alphabet for the encoding (*ACGTN* for DNA and *ACGUN* for RNA). Each sequence ends when another line starts with a '>' symbol.
- *FASTQ* format embeds in a *FASTA*-like file additional information about the quality with which sequences were produced by the NGS machines. The quality scores are encoded with a single ASCII character: the '!'

character represents the lowest quality and the '~' character the highest, respectively. In a FASTQ file each sequence is represented on four lines: i) the first line start with a '@' character and is followed by a sequence identifier and an optional description (like in a FASTA title line). ii) the second line contains the sequence of letters of a read. iii) the third line begins with a '+' character; iv) the fourth line encodes the quality values of the sequence, one per base. Hence, it must contain the same number of symbols as line two.

- *Tag* and *Tagq* file formats are customized output files of *BioSeqZip\_Collapser*, and have a column-based structure that is usually adopted by the smallRNA-Seq analysis tools. *Tagq* files have three columns: i) in the first column, the unique sequence (called tag) obtained after the read collapsing. ii) in the second column, the tag quality, obtained as the average quality of the collapsed sequences. iii) in the third column, the number of identical sequences in the input file that were collapsed to generate the tag. *Tag* files will have the same structure but with two columns only, as the quality information is not provided in this format.

## 1.2 In/Out File Formats of *BioSeqZip\_Expander*

*BioSeqZip\_Expander* can work on SAM and BAM file formats detailed in the following.

- *SAM* format is used for storing sequence data, either aligned or unaligned, in a human readable format [?]. A header section provides a list of reference sequences as well as other supplementary information provided by the alignment tool. In the second part, the file lists all the reads and the mapping positions on the reference in a tabular format. Each line includes eleven mandatory fields, the most important ones being the query name, the reference name, the position in the reference, and the read sequence).
- *BAM* format provides a binary version of the same data available in the SAM format. Clear advantage of this format is that it can be efficiently compressed to reduce storage occupancy.

## 2 Supplementary Availability

For the *BioSeqZip* project, we provide the following three repositories:

- <https://github.com/bioinformatics-polito/BioSeqZip.git> containing the *BioSeqZip* source code implementing the collapser and expander functionalities.
- <https://github.com/bioinformatics-polito/BioSeqZip-BWA.git> containing a modified version of BWA capable of using as input the read files generated by *BioSeqZip* for creating the full mapping files. This tool version does not need an expansion procedure of the output mapping files.
- <https://github.com/bioinformatics-polito/BioSeqZip-Yara.git> containing a modified version of Yara capable of using as input the read files generated by *BioSeqZip* for creating the full mapping files. This tool version does not need an expansion procedure of the output mapping files.

### 3 Supplementary Figures

|     | S1    | S2    | S3    | S4    | S5    | S6    |
|-----|-------|-------|-------|-------|-------|-------|
| BSZ | 49.2% | 71.8% | 63.0% | 47.0% | 27.3% | 53.6% |
| FU  | 49.2% | 71.8% | 63.0% | 47.0% | 27.3% | 53.6% |
| FXT | 49.2% | 71.8% | 63.0% | 47.0% | 27.3% | 53.6% |
| PDR | 49.2% | 71.8% | 63.0% | 45.4% | 26.4% | 52.1% |
| SC  | 49.2% | 71.8% | 63.0% | 47.0% | 27.3% | 53.6% |
| SD  | 71.3% | 77.1% | 73.2% | 62.9% | 65.4% | 66.7% |

Figure 1: Experimental comparison of collapsed files generated with different collapsing tools. In green, instances where the output file contained only non-redundant reads. In yellow, instances where not all the redundant reads were collapsed. In red, instances where the input files were over-collapsed (i.e. not equal reads are grouped together) and the coherent representation of the read set is lost.

### 4 Supplementary Analysis

#### 4.1 Collapsing performance on Single Cell samples

For this experiment, we used the two Single-Cell RNA-Seq samples from 10-week human embryo forebrain tissues (SRP129388), characterized by a conspicuous number of reads: in total 505 million reads with a 98 bp length. These samples were sequenced by Illumina HiSeq 2500 sequencing technology and the original files are 150GB large.

The results of this test are shown in the barchart of *Figure 2*. More specifically, the five groups of bars in the figure show the impact of the tool on the analysis of two samples (S906 and S907), in terms of % reduction of five figures of merit: file size, number of reads, computational time for mapping with Yara, Bowtie2 and BWA, respectively.

The same alignment time reductions shown in this chart were also experienced when using as a reference the Human Genome HG38.

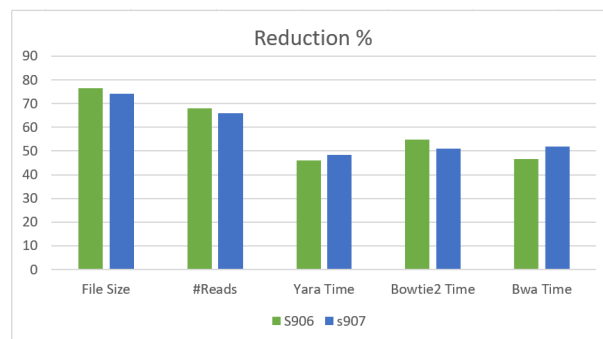

Figure 2: Collapsing performance on Single Cell samples. Bars represent the percentage reduction in terms of file size, number of reads, computational time for mapping with Yara, Bowtie2 and BWA, respectively. Green and blue bars refer to the two Single Cell samples used for the experiment.

## 4.2 BioSeqZip on DNA-Seq data

We tested the collapsing procedure provided by BioSeqZip on a 74x coverage DNA-seq paired-end sample (SRR7890958) with the following Library specs:

- Name: FFG\_IL\_N\_6h
- Instrument: Illumina HiSeq 4000
- Strategy: WGS
- Source: GENOMIC
- Selection: RANDOM
- Layout: PAIRED
- Coverage: 74x
- Total reads after trimming: 1,523,752,982

First of all, we tested single-end collapsing running BioSeqZip on the first mate of the sample, experiencing an 18.38% gain in terms of the number of reads in the file which corresponds to 19.65% gain in disk space. Then, we run the BioSeqZip\_collapser on the paired-end files experiencing a read compression of 8.70% and a disk space reduction of 10.01%.

The reason of these observations could be that DNA-seq samples, given the origin of the sequenced data, exposes a lower redundancy, leading to lower compression, making the collapsing procedure less effective reducing the gain the user can expect to have in post-collapsing pipelines.

## 4.3 BioSeqZip - RAM/Runtime trade-off

In Table 1 we explore the trade-off between the maximum amount of RAM BioSeqZip is allowed to use and the number of seconds required for running the collapse procedure.

Table 1: Specification of the raw and collapsed samples part of the BodyMap dataset

| Max RAM<br>[GB] | Runtime [s] |           |           |           |           |           |
|-----------------|-------------|-----------|-----------|-----------|-----------|-----------|
|                 | ERR030890   |           | ERR030896 |           | ERR030902 |           |
|                 | 1 thread    | 4 threads | 1 thread  | 4 threads | 1 thread  | 4 threads |
| 4               | 377         | 304       | 435       | 379       | 470       | 379       |
| 8               | 405         | 329       | 467       | 372       | 472       | 397       |
| 16              | 379         | 336       | 481       | 394       | 512       | 442       |
| 32              | 301         | 227       | 413       | 300       | 457       | 313       |

The analysis highlights that the runtime required for collapsing a sample slightly increases as the size of the internal buffer, used for storing the sequences, increase. This is due to the algorithmic structure of BioSeqZip: it is composed of an I/O part, which scales linearly with the amount of data to be read or written, and a collapsing part whose core is the buffer sorting engine, which sorts the sequences to be collapsed in alphabetical order. The higher runtime observed when collapsing a larger amount of data is related to the asymptotic complexity of the sorting algorithm being  $O(n * \log(n))$ . Basically, given  $X$  sequences read from the disk in time  $R$  and sorted in time  $S$ , performing I/O on  $2 * X$  data requires  $2 * R$ , but sorting them requires more than  $2 * S$ .

This trend is broken when the collapser is allowed to use an amount of RAM bigger than the size of the samples (all three samples have approximately 17-18 GB size). In this case, the higher runtime required by the sorting algorithm is balanced by the fact that BioSeqZip does not need to create temporary files on the disk for performing sequences merging, allowing the collapser to used much less I/O operations, which are the real runtime bottleneck in the typical scenario where BioSeqZip operates.

## 4.4 BioSeqZip+STAR vs Rail-RNA

In table 2 we reports the output of the comparison between samples alignment with Rail-RNA and with the combination of BioSeqZip and STAR. Rail-RNA was run with the default local configuration using 8 running threads, in order to be fair with the previous analysis carried on with STAR. Also, Rail-RNA was not asked to report deliverables different from its default one.

Table 2: Specification of the raw and collapsed samples part of the BodyMap dataset

|                                              | Tool               | Runtime partials [s] | Runtime total [s] | Runtime total [h] |
|----------------------------------------------|--------------------|----------------------|-------------------|-------------------|
| ERR030888<br>(single-sample x 75bp)          | BioSeqZip collapse | 367                  | 2521              | 0.7               |
|                                              | STAR               | 1086                 |                   |                   |
|                                              | BioSeqZip expand   | 1068                 |                   |                   |
|                                              | Rail-RNA default   | 22892                | 22892             | 6.36              |
| BodyMap<br>Single-End<br>(16 samples x 75bp) | BioSeqZip collapse | 7763                 | 55047             | 15.29             |
|                                              | STAR               | 40255                |                   |                   |
|                                              | BioSeqZip expand   | 7029                 |                   |                   |
|                                              | Rail-RNA default   | 170538               | 170538            | 47.37             |

The exact command line used is:

```

rail-rna go local -m <manifest path> \
-x <bowtie index path> <bowtie2 index path> \
-p 8 -o <output directory path>

```

As highlighted by the result table the runtime of the pipeline featuring BioSeqZip and STAR is lower than the one of Rail-RNA. However, such comparison is not completely fair: first of all, the information the two alignment tools provide are not the same, with Rail-RNA providing more data than STAR. Then, it should be noticed that Rail-RNA is a cloud-ready alignment tool whose design and implementation may have led to solutions which do not perform best on local and resource-constrained machines, which are the targets BioSeqZip was mainly designed for.

## 5 Supplementary Tables

Table 3: Specification of the raw and collapsed samples part of the BodyMap dataset

| BodyMap 2.0 - Sample statistics |                |              |                   |              |             |             |         |        |
|---------------------------------|----------------|--------------|-------------------|--------------|-------------|-------------|---------|--------|
| SAMPLE                          | RAW            |              | COLLAPSED RECORDS |              |             |             | GAIN    |        |
|                                 | RECORDS<br>[M] | SIZE<br>[GB] | RECORDS<br>[M]    | SIZE<br>[GB] | TIME<br>[s] | RAM<br>[GB] | RECORDS | SIZE   |
| ERR030872                       | 81.91          | 24.96        | 44.24             | 10.53        | 655         | 7.20        | 45.99%  | 57.83% |
| ERR030873                       | 81.84          | 24.94        | 43.39             | 10.33        | 623         | 7.20        | 46.98%  | 58.60% |
| ERR030874                       | 80.95          | 24.67        | 52.56             | 12.51        | 690         | 7.20        | 35.06%  | 49.29% |
| ERR030875                       | 81.22          | 24.75        | 32.01             | 7.61         | 585         | 7.20        | 60.59%  | 69.25% |
| ERR030876                       | 82.11          | 25.03        | 30.91             | 7.35         | 566         | 7.20        | 62.35%  | 70.62% |
| ERR030877                       | 82.33          | 25.09        | 33.88             | 8.06         | 611         | 7.20        | 58.85%  | 67.89% |
| ERR030878                       | 82.08          | 25.02        | 26.77             | 6.36         | 567         | 7.20        | 67.39%  | 74.56% |
| ERR030879                       | 79.30          | 24.17        | 24.96             | 5.93         | 562         | 7.20        | 68.52%  | 75.45% |
| ERR030880                       | 77.30          | 23.56        | 37.49             | 8.92         | 631         | 7.20        | 51.50%  | 62.14% |
| ERR030881                       | 74.47          | 22.70        | 40.94             | 9.74         | 583         | 7.20        | 45.03%  | 57.09% |
| ERR030882                       | 73.51          | 22.41        | 53.48             | 12.73        | 619         | 7.21        | 27.25%  | 43.19% |
| ERR030883                       | 75.86          | 23.12        | 39.87             | 9.49         | 568         | 7.20        | 47.44%  | 58.98% |
| ERR030884                       | 82.44          | 25.13        | 30.07             | 7.15         | 590         | 7.20        | 63.53%  | 71.55% |
| ERR030885                       | 80.40          | 24.51        | 32.03             | 7.62         | 624         | 7.20        | 60.16%  | 68.92% |
| ERR030886                       | 82.92          | 25.28        | 38.46             | 9.15         | 590         | 7.20        | 53.61%  | 63.80% |
| ERR030887                       | 80.05          | 24.40        | 31.40             | 7.47         | 569         | 7.20        | 60.77%  | 69.39% |
| ERR030888                       | 76.27          | 15.17        | 22.63             | 3.70         | 367         | 7.93        | 70.33%  | 75.62% |
| ERR030889                       | 76.17          | 15.15        | 29.14             | 4.77         | 394         | 7.93        | 61.74%  | 68.54% |
| ERR030890                       | 64.31          | 12.79        | 32.68             | 5.35         | 337         | 7.93        | 49.19%  | 58.21% |
| ERR030891                       | 77.20          | 15.36        | 26.10             | 4.27         | 388         | 7.93        | 66.19%  | 72.21% |
| ERR030892                       | 80.26          | 15.97        | 22.61             | 3.70         | 380         | 7.93        | 71.83%  | 76.85% |
| ERR030893                       | 79.77          | 15.87        | 22.93             | 3.75         | 379         | 7.93        | 71.25%  | 76.38% |
| ERR030894                       | 76.77          | 15.27        | 27.97             | 4.58         | 368         | 7.93        | 63.56%  | 70.05% |
| ERR030895                       | 77.45          | 15.41        | 20.94             | 3.42         | 366         | 7.93        | 72.96%  | 77.79% |
| ERR030896                       | 81.26          | 16.17        | 16.84             | 2.75         | 401         | 7.93        | 79.28%  | 82.98% |
| ERR030897                       | 81.92          | 16.30        | 19.29             | 3.15         | 386         | 7.93        | 76.46%  | 80.66% |
| ERR030898                       | 83.32          | 16.58        | 19.21             | 3.14         | 382         | 7.93        | 76.95%  | 81.06% |
| ERR030899                       | 82.86          | 16.49        | 13.68             | 2.23         | 350         | 7.93        | 83.49%  | 86.45% |
| ERR030900                       | 82.79          | 16.47        | 20.45             | 3.34         | 409         | 7.93        | 75.30%  | 79.70% |
| ERR030901                       | 81.00          | 16.12        | 33.94             | 5.55         | 404         | 7.93        | 58.10%  | 65.54% |
| ERR030902                       | 82.04          | 16.32        | 30.38             | 4.97         | 409         | 7.93        | 62.97%  | 69.56% |
| ERR030903                       | 80.25          | 15.97        | 28.56             | 4.67         | 386         | 7.93        | 64.41%  | 70.74% |

Table 4: Runtime report of three experiments: (BWA only) samples alignment using the BWA tool as it is, (BWA + BioSeqZip separate expander) collapsed samples alignment using BWA, considering the runtime of the BioSeqZip-expander tool, (BWA + BioSeqZip embedded expander) collapsed samples alignment using BioSeqZip-BWA, i.e. BWA with the expanding functionalities integrated (BioSeqZip-BWA is available at <https://github.com/bioinformatics-polito/BioSeqZip-BWA.git>)

|            | BWA only | BWA + BioSeqZip<br>(Separate expander) |       |        |       |         | BWA + BioSeqZip<br>(Embedded expander) |       |       |        |
|------------|----------|----------------------------------------|-------|--------|-------|---------|----------------------------------------|-------|-------|--------|
| Sample     | Align    | Collapse                               | Align | Expand | Tot   | Gain    | Collapse                               | Align | Tot   | Gain   |
| ERR030872  | 2483     | 655                                    | 1298  | 1196   | 3149  | -26.82% | 655                                    | 1234  | 1889  | 23.92% |
| ERR030873  | 2329     | 623                                    | 1237  | 1216   | 3076  | -32.07% | 623                                    | 1192  | 1815  | 22.07% |
| ERR030874  | 2578     | 690                                    | 1587  | 1349   | 3626  | -40.65% | 690                                    | 1520  | 2210  | 14.27% |
| ERR030875  | 2542     | 585                                    | 1016  | 1045   | 2646  | -4.09%  | 585                                    | 980   | 1565  | 38.43% |
| ERR030876  | 2168     | 566                                    | 797   | 994    | 2357  | -8.72%  | 566                                    | 796   | 1362  | 37.18% |
| ERR030877  | 2510     | 611                                    | 1029  | 1042   | 2682  | -6.85%  | 611                                    | 1010  | 1621  | 35.42% |
| ERR030878  | 2721     | 567                                    | 898   | 878    | 2343  | 13.89%  | 567                                    | 965   | 1532  | 43.70% |
| ERR030879  | 2414     | 562                                    | 791   | 920    | 2273  | 5.84%   | 562                                    | 761   | 1323  | 45.19% |
| ERR030880  | 2120     | 631                                    | 1089  | 1078   | 2798  | -31.98% | 631                                    | 996   | 1627  | 23.25% |
| ERR030881  | 2402     | 583                                    | 1358  | 1106   | 3047  | -26.85% | 583                                    | 1249  | 1832  | 23.73% |
| ERR030882  | 1963     | 619                                    | 1493  | 1319   | 3431  | -74.78% | 619                                    | 1356  | 1975  | -0.61% |
| ERR030883  | 2121     | 568                                    | 1169  | 1128   | 2865  | -35.08% | 568                                    | 1070  | 1638  | 22.77% |
| ERR030884  | 2314     | 590                                    | 903   | 1002   | 2495  | -7.82%  | 590                                    | 832   | 1422  | 38.55% |
| ERR030885  | 2254     | 624                                    | 967   | 1014   | 2605  | -15.57% | 624                                    | 888   | 1512  | 32.92% |
| ERR030886  | 1986     | 590                                    | 1001  | 1133   | 2724  | -37.16% | 590                                    | 914   | 1504  | 24.27% |
| ERR030887  | 2131     | 569                                    | 874   | 1011   | 2454  | -15.16% | 569                                    | 782   | 1351  | 36.60% |
| ERR030888  | 1272     | 367                                    | 441   | 463    | 1271  | 0.08%   | 367                                    | 435   | 802   | 36.95% |
| ERR030889  | 1495     | 394                                    | 656   | 506    | 1556  | -4.08%  | 394                                    | 642   | 1036  | 30.70% |
| ERR030890  | 1040     | 337                                    | 602   | 552    | 1491  | -43.37% | 337                                    | 585   | 922   | 11.35% |
| ERR030891  | 1289     | 388                                    | 520   | 487    | 1395  | -8.22%  | 388                                    | 510   | 898   | 30.33% |
| ERR030892  | 1299     | 380                                    | 459   | 471    | 1310  | -0.85%  | 380                                    | 449   | 829   | 36.18% |
| ERR030893  | 1451     | 379                                    | 488   | 457    | 1324  | 8.75%   | 379                                    | 453   | 832   | 42.66% |
| ERR030894  | 1215     | 368                                    | 504   | 507    | 1379  | -13.50% | 368                                    | 474   | 842   | 30.70% |
| ERR030895  | 1310     | 366                                    | 403   | 446    | 1215  | 7.25%   | 366                                    | 376   | 742   | 43.36% |
| ERR030896  | 1468     | 401                                    | 370   | 436    | 1207  | 17.78%  | 401                                    | 350   | 751   | 48.84% |
| ERR030897  | 1716     | 386                                    | 442   | 451    | 1279  | 25.47%  | 386                                    | 415   | 801   | 53.32% |
| ERR030898  | 1453     | 382                                    | 407   | 449    | 1238  | 14.80%  | 382                                    | 387   | 769   | 47.08% |
| ERR030899  | 1248     | 350                                    | 266   | 434    | 1050  | 15.87%  | 350                                    | 251   | 601   | 51.84% |
| ERR030900  | 1407     | 409                                    | 424   | 478    | 1311  | 6.82%   | 409                                    | 395   | 804   | 42.86% |
| ERR030901  | 1406     | 404                                    | 690   | 586    | 1680  | -19.49% | 404                                    | 645   | 1049  | 25.39% |
| ERR030902  | 1336     | 409                                    | 599   | 562    | 1570  | -17.51% | 409                                    | 560   | 969   | 27.47% |
| ERR030903  | 1358     | 386                                    | 588   | 564    | 1538  | -13.25% | 386                                    | 545   | 931   | 31.44% |
| Paired-End | 37036    | 9633                                   | 17507 | 17431  | 44571 | -20.35% | 9633                                   | 16545 | 26178 | 29.32% |
| Single-End | 21763    | 6106                                   | 7859  | 7849   | 21814 | -0.23%  | 6106                                   | 7472  | 13578 | 37.61% |

Table 5: Runtime report of three experiments: (Yara only) samples alignment using the Yara tool as it is, (Yara + BioSeqZip separate expander) collapsed samples alignment using Yara, considering the runtime of the BioSeqZip-expander tool, (Yara + BioSeqZip embedded expander) collapsed samples alignment using BioSeqZip-Yara, i.e. Yara with the expanding functionalities integrated (BioSeqZip-Yara is available at <https://github.com/bioinformatics-polito/BioSeqZip-Yara.git>)

|            | Yara only | Yara + BioSeqZip<br>(Separate expander) |       |        |       |          | Yara + BioSeqZip<br>(Embedded expander) |       |       |         |
|------------|-----------|-----------------------------------------|-------|--------|-------|----------|-----------------------------------------|-------|-------|---------|
| Sample     | Align     | Collapse                                | Align | Expand | Tot   | Gain     | Collapse                                | Align | Tot   | Gain    |
| ERR030872  | 1323      | 655                                     | 981   | 1337   | 2973  | -124.72% | 655                                     | 1041  | 1696  | -28.19% |
| ERR030873  | 1316      | 623                                     | 925   | 1291   | 2839  | -115.73% | 623                                     | 860   | 1483  | -12.69% |
| ERR030874  | 1442      | 690                                     | 1148  | 1424   | 3262  | -126.21% | 690                                     | 1024  | 1714  | -18.86% |
| ERR030875  | 1397      | 585                                     | 724   | 1150   | 2459  | -76.02%  | 585                                     | 668   | 1253  | 10.31%  |
| ERR030876  | 1218      | 566                                     | 566   | 1021   | 2153  | -76.77%  | 566                                     | 558   | 1124  | 7.72%   |
| ERR030877  | 1419      | 611                                     | 756   | 1130   | 2497  | -75.97%  | 611                                     | 718   | 1329  | 6.34%   |
| ERR030878  | 1675      | 567                                     | 662   | 966    | 2195  | -31.04%  | 567                                     | 638   | 1205  | 28.06%  |
| ERR030879  | 1623      | 562                                     | 602   | 950    | 2114  | -30.25%  | 562                                     | 595   | 1157  | 28.71%  |
| ERR030880  | 1253      | 631                                     | 774   | 1137   | 2542  | -102.87% | 631                                     | 720   | 1351  | -7.82%  |
| ERR030881  | 1713      | 583                                     | 1102  | 1139   | 2824  | -64.86%  | 583                                     | 1000  | 1583  | 7.59%   |
| ERR030882  | 1367      | 619                                     | 1090  | 1360   | 3069  | -124.51% | 619                                     | 981   | 1600  | -17.04% |
| ERR030883  | 1258      | 568                                     | 915   | 1147   | 2630  | -109.06% | 568                                     | 839   | 1407  | -11.84% |
| ERR030884  | 1356      | 590                                     | 707   | 1045   | 2342  | -72.71%  | 590                                     | 667   | 1257  | 7.30%   |
| ERR030885  | 1550      | 624                                     | 973   | 1029   | 2626  | -69.42%  | 624                                     | 889   | 1513  | 2.39%   |
| ERR030886  | 1192      | 590                                     | 731   | 1141   | 2462  | -106.54% | 590                                     | 688   | 1278  | -7.21%  |
| ERR030887  | 1222      | 569                                     | 610   | 1089   | 2268  | -85.60%  | 569                                     | 555   | 1124  | 8.02%   |
| ERR030888  | 597       | 367                                     | 199   | 521    | 1087  | -82.08%  | 367                                     | 323   | 690   | -15.58% |
| ERR030889  | 668       | 394                                     | 302   | 499    | 1195  | -78.89%  | 394                                     | 349   | 743   | -11.23% |
| ERR030890  | 515       | 337                                     | 303   | 514    | 1154  | -124.08% | 337                                     | 457   | 794   | -54.17% |
| ERR030891  | 590       | 388                                     | 254   | 474    | 1116  | -89.15%  | 388                                     | 284   | 672   | -13.90% |
| ERR030892  | 583       | 380                                     | 208   | 464    | 1052  | -80.45%  | 380                                     | 301   | 681   | -16.81% |
| ERR030893  | 707       | 379                                     | 226   | 440    | 1045  | -47.81%  | 379                                     | 206   | 585   | 17.26%  |
| ERR030894  | 607       | 368                                     | 252   | 522    | 1142  | -88.14%  | 368                                     | 232   | 600   | 1.15%   |
| ERR030895  | 676       | 366                                     | 198   | 487    | 1051  | -55.47%  | 366                                     | 191   | 557   | 17.60%  |
| ERR030896  | 710       | 401                                     | 159   | 453    | 1013  | -42.68%  | 401                                     | 152   | 553   | 22.11%  |
| ERR030897  | 741       | 386                                     | 183   | 438    | 1007  | -35.90%  | 386                                     | 177   | 563   | 24.02%  |
| ERR030898  | 726       | 382                                     | 179   | 462    | 1023  | -40.91%  | 382                                     | 169   | 551   | 24.10%  |
| ERR030899  | 619       | 350                                     | 112   | 390    | 852   | -37.64%  | 350                                     | 116   | 466   | 24.72%  |
| ERR030900  | 661       | 409                                     | 197   | 509    | 1115  | -68.68%  | 409                                     | 196   | 605   | 8.47%   |
| ERR030901  | 655       | 404                                     | 325   | 617    | 1346  | -105.50% | 404                                     | 315   | 719   | -9.77%  |
| ERR030902  | 625       | 409                                     | 287   | 550    | 1246  | -99.36%  | 409                                     | 256   | 665   | -6.40%  |
| ERR030903  | 710       | 386                                     | 286   | 525    | 1197  | -68.59%  | 386                                     | 246   | 632   | 10.99%  |
| Paired-End | 22324     | 9633                                    | 13266 | 18356  | 41255 | -84.80%  | 9633                                    | 12441 | 22074 | 1.12%   |
| Single-End | 10390     | 6106                                    | 3670  | 7865   | 17641 | -69.79%  | 6106                                    | 3970  | 10076 | 3.02%   |
